# Supplementary material for: Camphene as a Protective Agent in Myocardial Ischemia/Reperfusion Injury
Source: MDPI journal article supplement (doi:10.3390/antiox13040405), 2024-03-28
Supplement: s1 [file s1]

Supplementary material

**Table S1. Primers sequences used for the real-time PCR**

| Gene |      | sequence               |
|------|------|------------------------|
| Actb | For: | GCCCTGAGGCACTCTTCCA    |
|      | Rev: | CGGATGTCCACGTCACACTTC  |
| GPx4 | For: | ATAAGAACGGCTGCGTGGTGAA |
|      | Rev: | GGCACACACTTGTAGGGCTAGA |
| Nrf2 | For: | CCAGAAGCCACACTGACAGA   |
|      | Rev: | GGAGAGGATGCTGCTGAAAG   |
| SOD  | For: | GGAGTCCAAGGTTCAAGCT    |
|      | Rev: | AGGTAGTAAGCGTGCTCCCA   |
| HO-1 | For: | CAGAACCCAGTCTATGCCCC   |
|      | Rev: | GTGAGGCCCATACCAGAAGG   |
| UCP3 | For: | ACAAAGGATTCATGCCCTCC   |
|      | Rev: | GATTCCCGCAGTACCTGGAC   |
